# Supplementary material for: Serological responses to SARS-CoV-2 following non-hospitalised infection: clinical and ethnodemographic features associated with the magnitude of the antibody response
Source: PubMed Central journal article supplement (PMC8474079; doi:10.1136/bmjresp-2020-000872), 2021-09-23
Supplement: bmjresp-2020-000872supp001.pdf [file bmjresp-2020-000872supp001.pdf]

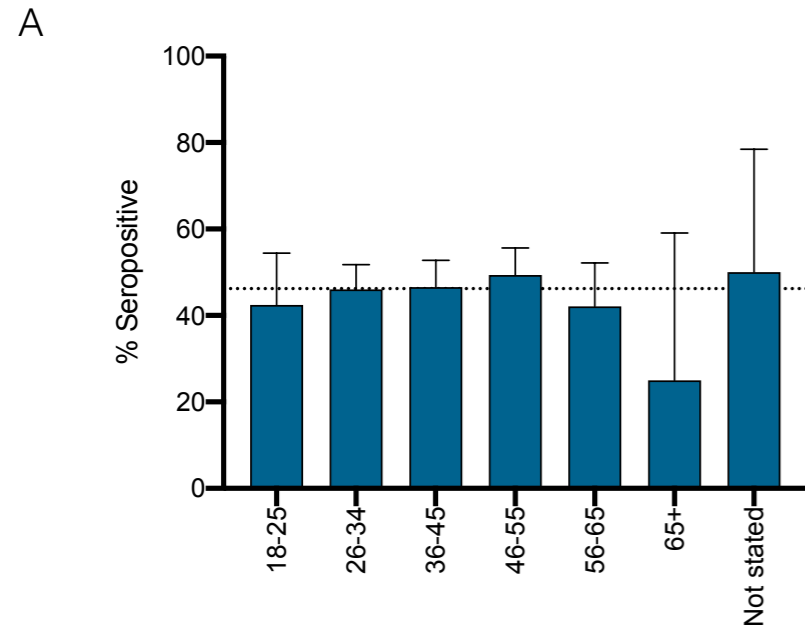

|                  |    |     |     |     |    |   |   |
|------------------|----|-----|-----|-----|----|---|---|
| Seropositive (n) | 28 | 133 | 116 | 119 | 40 | 2 | 4 |
| Total (n)        | 66 | 289 | 249 | 241 | 95 | 8 | 8 |

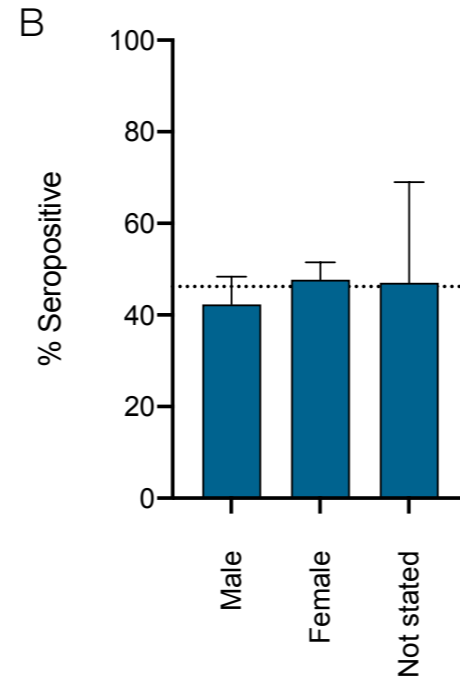

|                  |     |     |    |
|------------------|-----|-----|----|
| Seropositive (n) | 110 | 324 | 8  |
| Total (n)        | 260 | 679 | 17 |

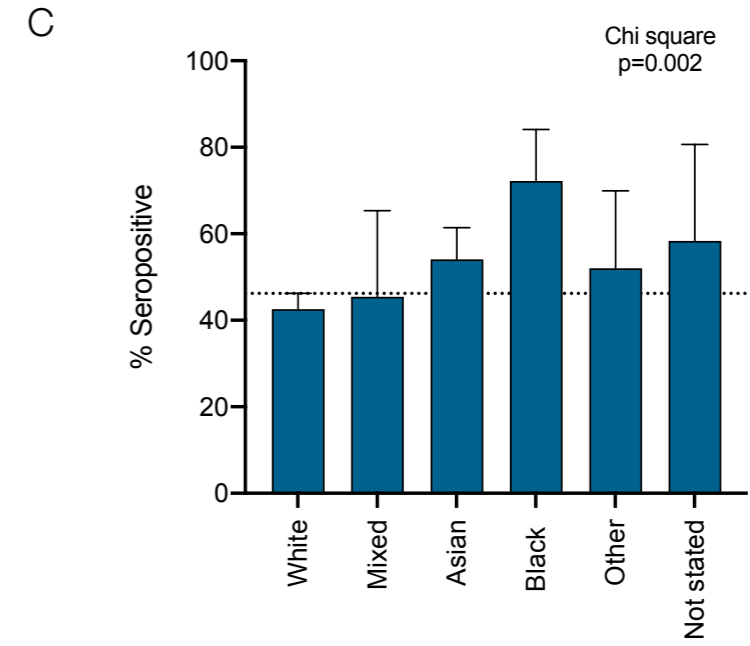

|                  |     |    |     |    |    |    |
|------------------|-----|----|-----|----|----|----|
| Seropositive (n) | 294 | 10 | 92  | 26 | 13 | 7  |
| Total (n)        | 691 | 22 | 170 | 36 | 25 | 12 |

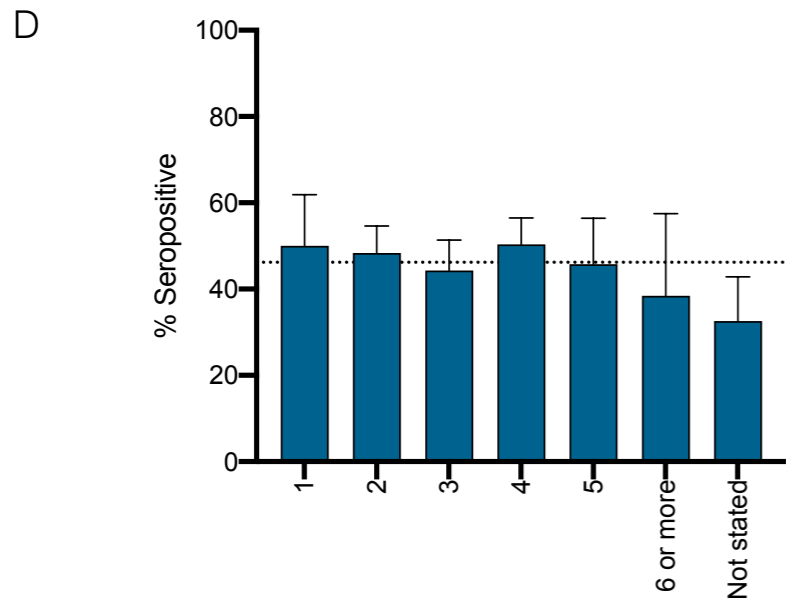

|                  |    |     |     |     |    |    |    |
|------------------|----|-----|-----|-----|----|----|----|
| Seropositive (n) | 32 | 118 | 86  | 129 | 38 | 10 | 29 |
| Total (n)        | 64 | 244 | 194 | 256 | 83 | 26 | 89 |

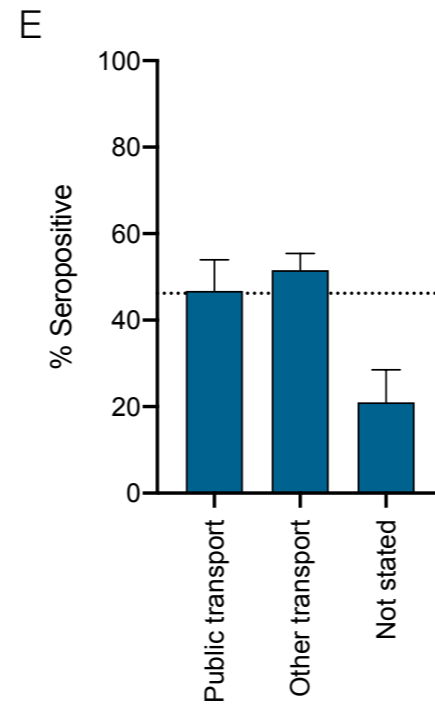

|                  |     |     |     |
|------------------|-----|-----|-----|
| Seropositive (n) | 87  | 326 | 29  |
| Total (n)        | 186 | 632 | 138 |

## Supplementary Figure 1

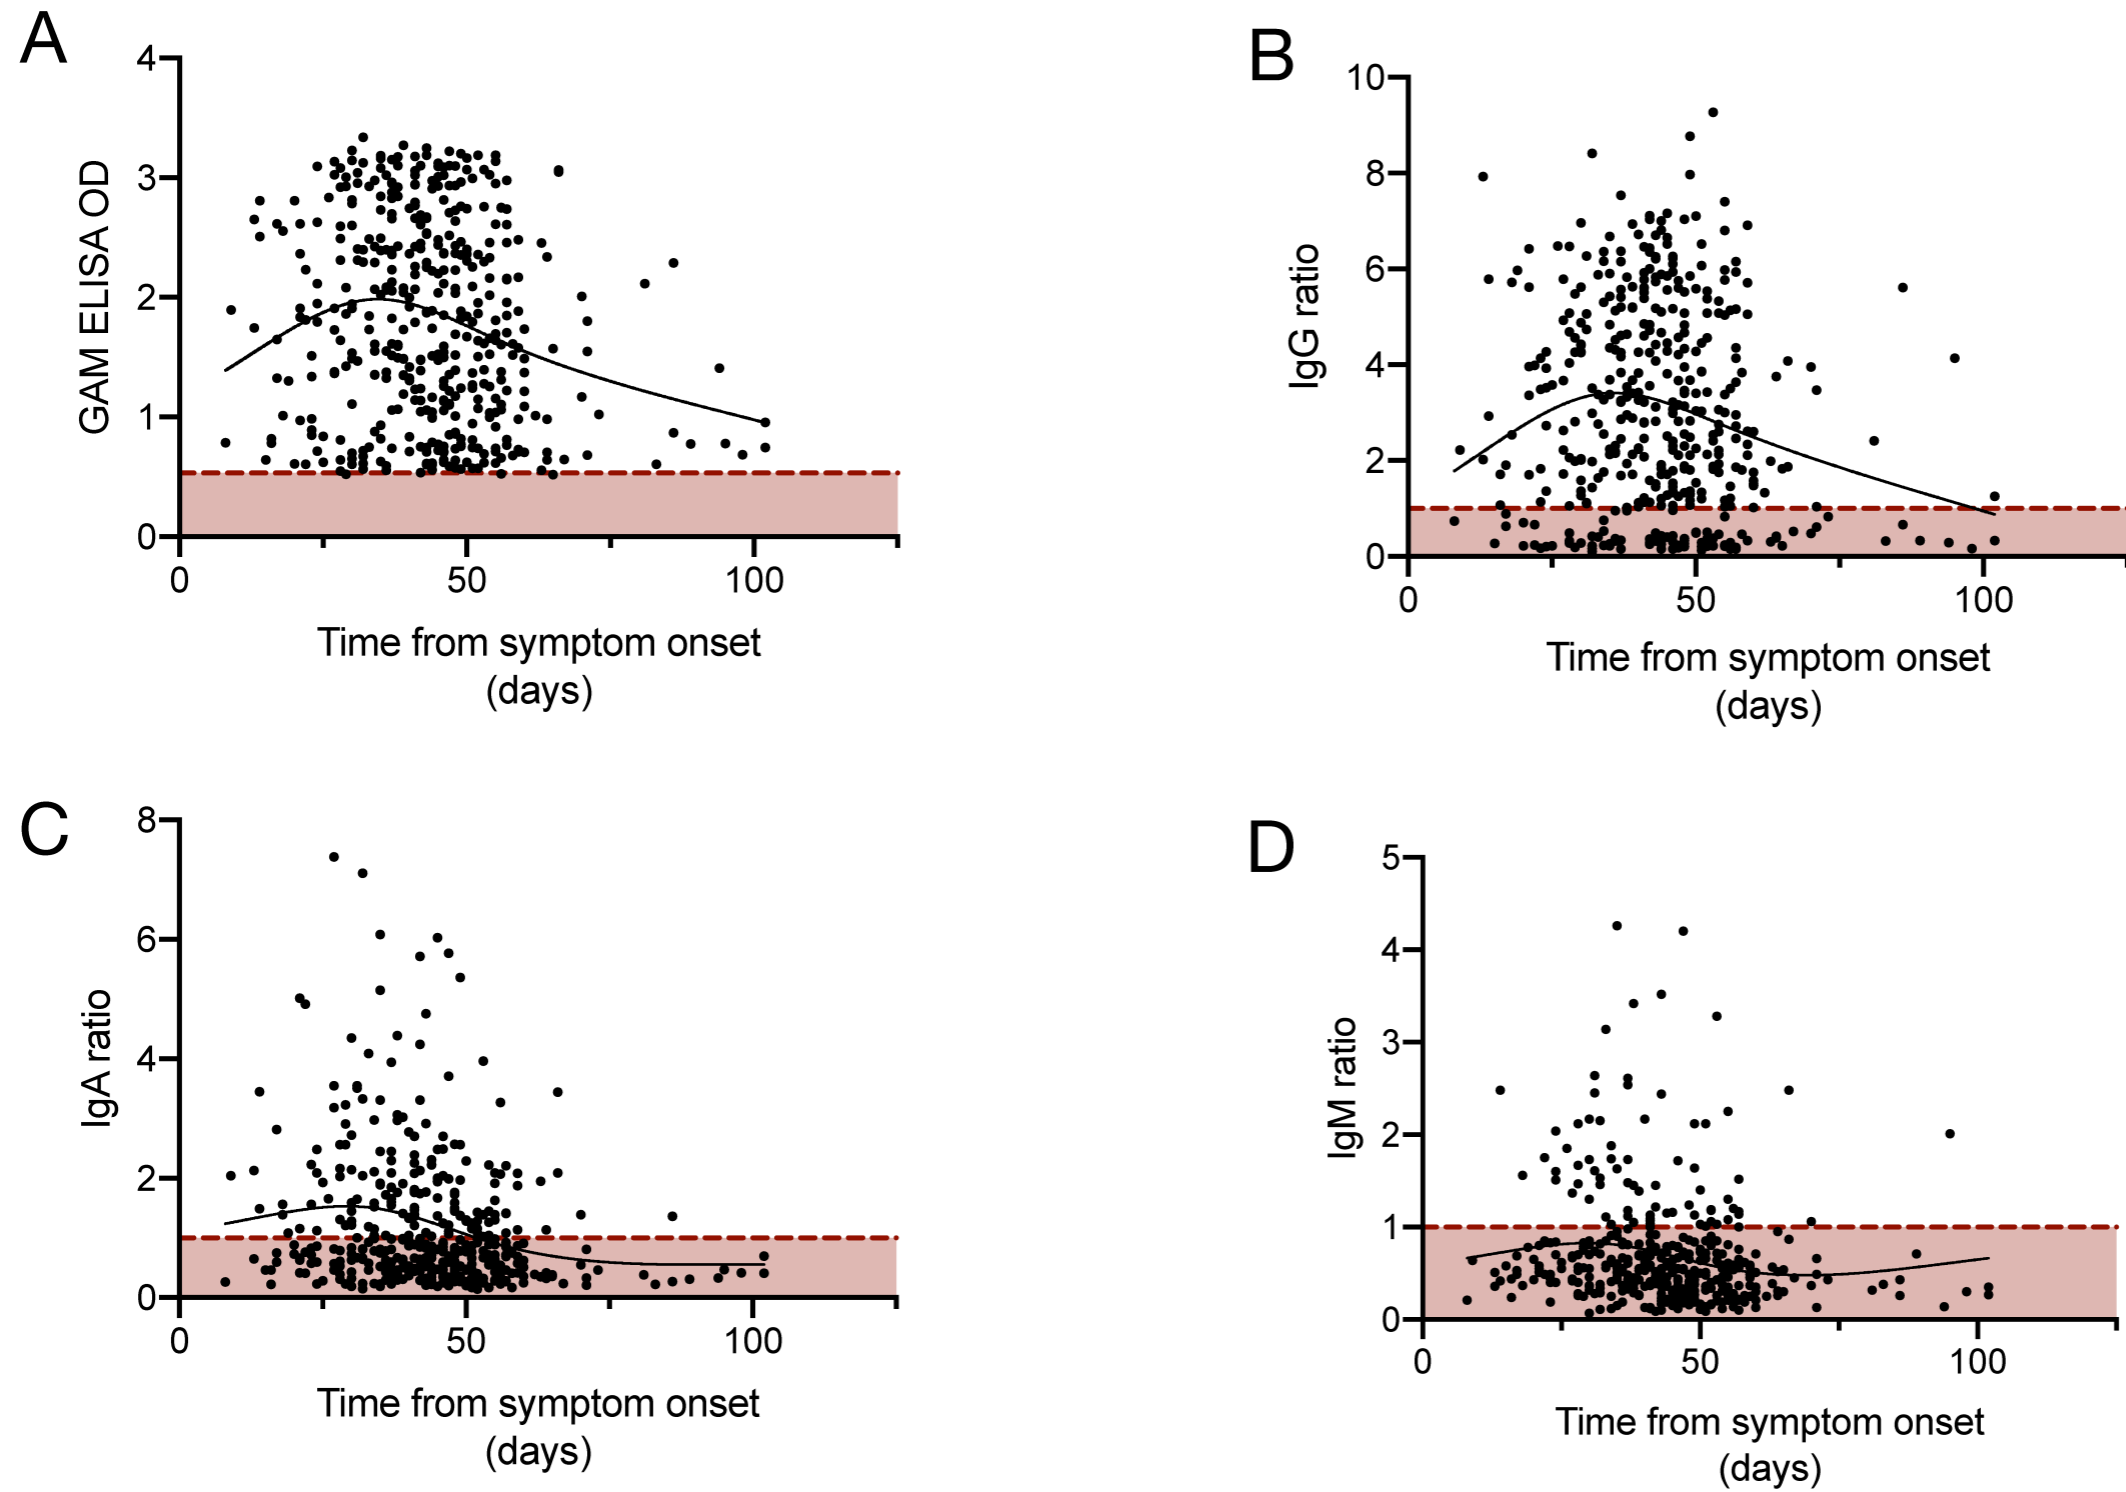Supplementary  
Figure 2

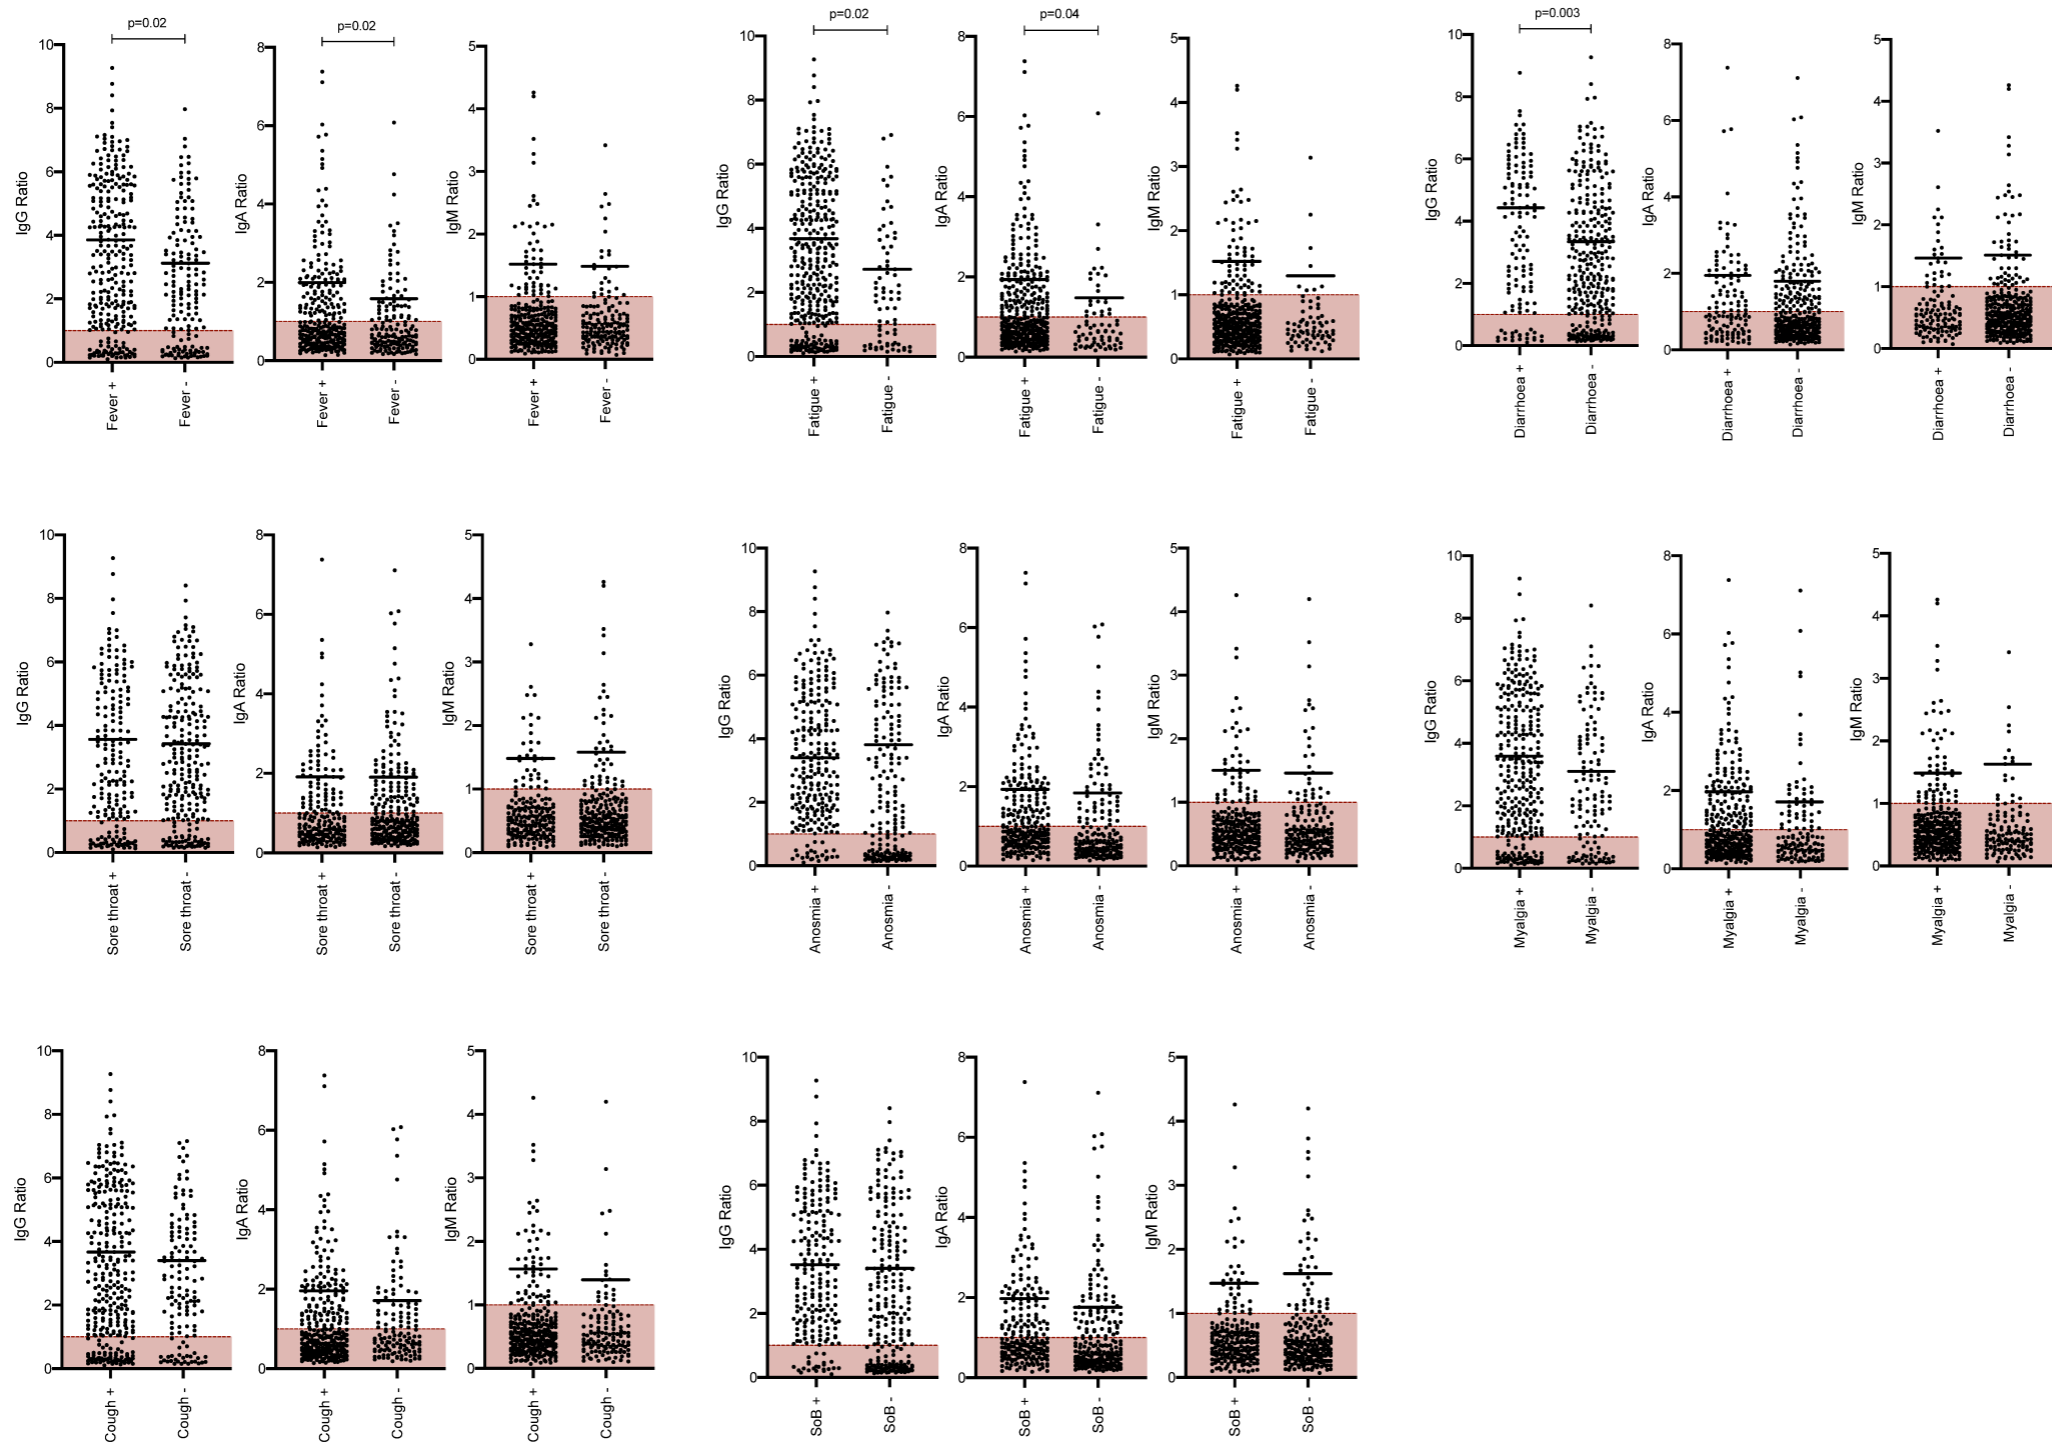

Supplementary  
Figure 3

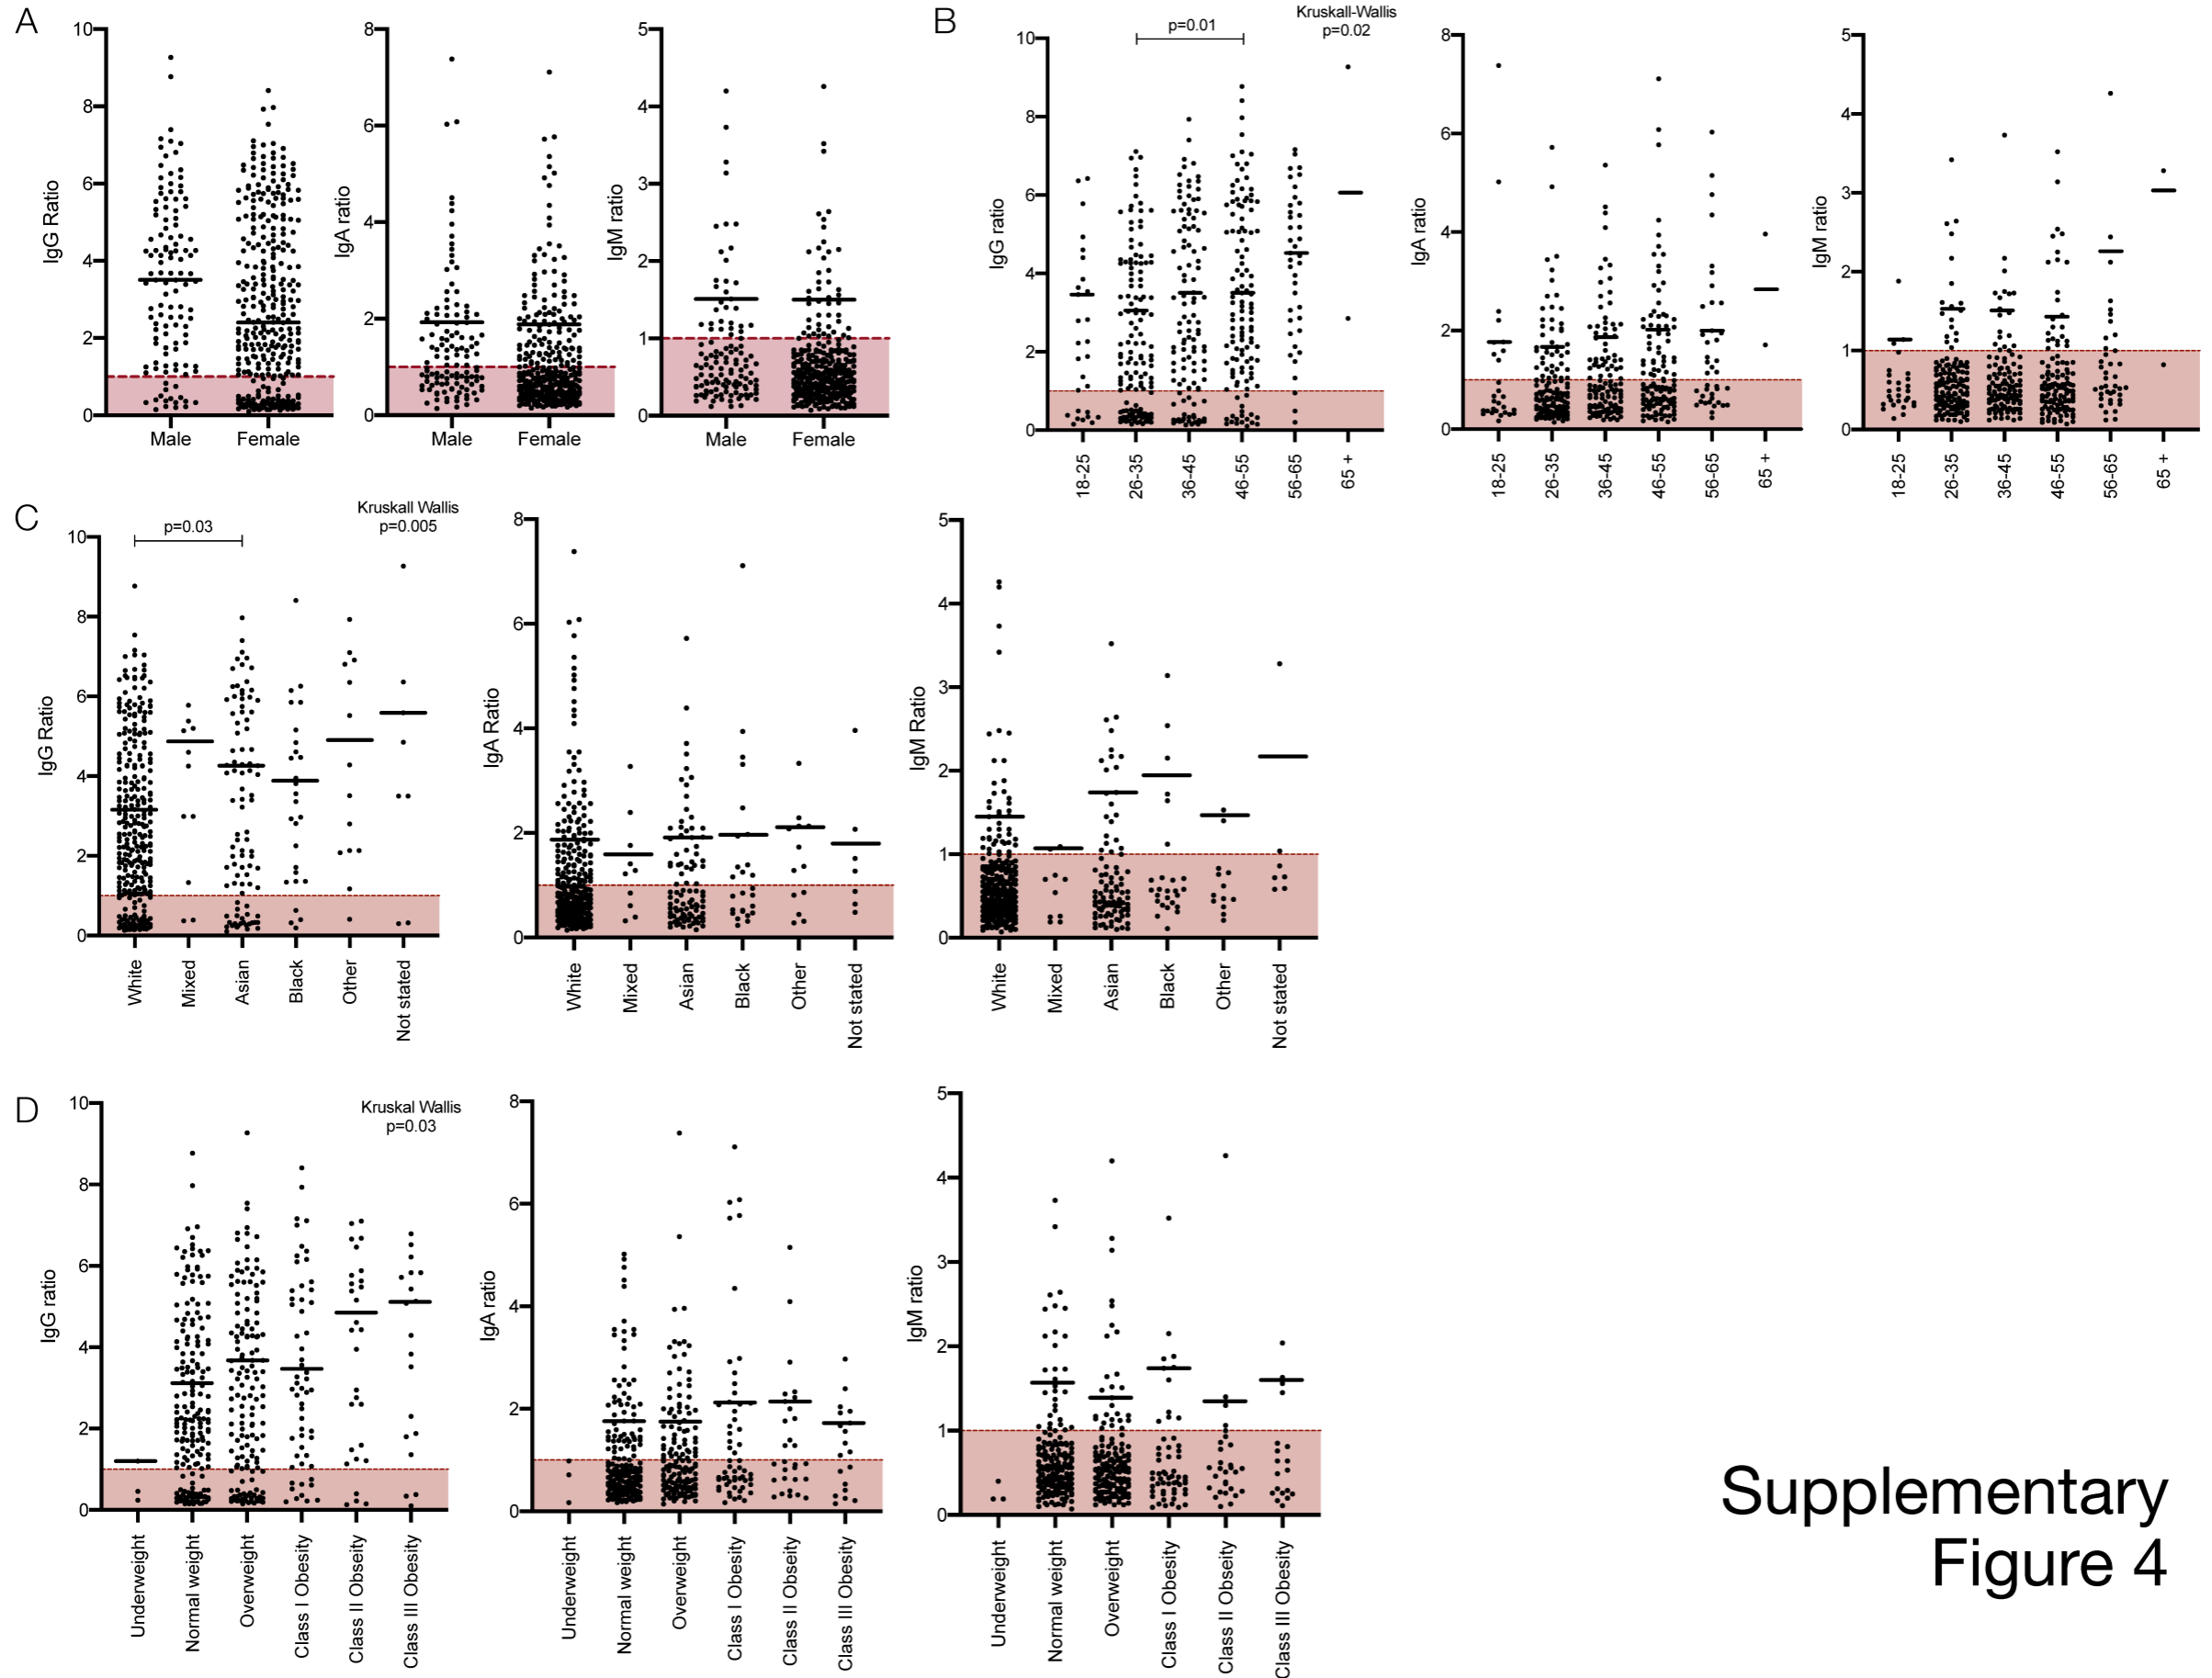

Supplementary Figure 4

| Variable                  | OR (95% CI)                       | Z           | P-value     |
|---------------------------|-----------------------------------|-------------|-------------|
| Age (years)               | 0.99<br>(0.97-1.01)               | 0.91        | 0.37        |
| Sex (Female)              | 0.78<br>(0.42-1.41)               | 0.83        | 0.41        |
| <b>Ethnicity (BAME)</b>   | <b>1.93</b><br><b>(1.11-3.40)</b> | <b>2.31</b> | <b>0.02</b> |
| Job role : Administration | 0.42<br>(0.07-2.20)               | 1.00        | 0.32        |
| Job role : AHP            | 0.41<br>(0.07-1.92)               | 1.09        | 0.27        |
| Job role : Doctor         | 0.46<br>(0.09-1.91)               | 1.02        | 0.31        |
| Job role: HCA             | 0.61<br>(0.10-3.11)               | 0.58        | 0.56        |
| Job role : Lab scientist  | 1.10<br>(0.15-7.96)               | 0.10        | 0.92        |
| Job role: Managerial      | 0.19<br>(0.02-1.22)               | 1.68        | 0.09        |
| Job role : Nurse/Midwife  | 0.61<br>(0.12-2.43)               | 0.67        | 0.50        |
| Job role : Research nurse | 0.26<br>(0.04-1.44)               | 1.49        | 0.14        |

**Supplementary Table 1:** Multiple logistic regression of seropositivity at time of study enrolment with respect to job role. Area under the curve for this model was 0.61 (CI 0.55-0.68,  $p=0.0008$ ).

| Variable                            | OR (95% CI)                       | Z           | P-value     |
|-------------------------------------|-----------------------------------|-------------|-------------|
| Age (years)                         | 0.99<br>(0.97-1.01)               | 0.57        | 0.57        |
| Sex (Female)                        | 0.8<br>(0.49-1.40)                | 0.70        | 0.48        |
| <b>Ethnicity (BAME)</b>             | <b>1.93</b><br><b>(1.10-3.43)</b> | <b>2.27</b> | <b>0.02</b> |
| Department:<br>Admin/management     | 0.54<br>(0.14-1.97)               | 0.92        | 0.36        |
| Department: AMU                     | 1.09<br>(0.32-3.85)               | 0.14        | 0.89        |
| Department: ED                      | 2.05<br>(0.53-9.05)               | 1.01        | 0.31        |
| Department:<br>Endoscopy/Theatres   | 1.07<br>(0.26-4.57)               | 0.09        | 0.93        |
| Department:<br>GIM/Geriatrics       | 1.43<br>(0.59-3.45)               | 0.80        | 0.42        |
| Department:<br>Haematology/Oncology | 2.67<br>(0.64-14.05)              | 1.28        | 0.20        |
| Department: ITU                     | 1.23<br>(0.45-3.38)               | 0.40        | 0.69        |
| Department: Laboratory<br>medicine  | 1.35<br>(0.33-6.16)               | 0.41        | 0.68        |
| Department: Pharmacy                | 0.51<br>(0.12-1.94)               | 0.97        | 0.33        |
| Department: R&D                     | 0.3<br>(0.04-1.59)                | 1.32        | 0.19        |
| Department: Renal                   | 0.67<br>(0.20-2.16)               | 0.67        | 0.50        |
| Department: Surgery                 | 0.98<br>(0.36-2.67)               | 0.03        | 0.97        |

**Supplementary Table 2:** Multiple logistic regression of seropositivity at time of study enrolment with respect to department. Area under the curve for this model was 0.64 (CI 0.58-0.71,  $p<0.0001$ ).
